# Supplementary material for: Dormant origin firing promotes head-on transcription-replication conflicts at transcription termination sites in response to BRCA2 deficiency
Source: PubMed Central journal article supplement (PMC11148086; doi:10.1038/s41467-024-48286-1), 2024-06-03
Supplement: 41467_2024_48286_MOESM3_ESM.pdf [file 41467_2024_48286_MOESM3_ESM.pdf]

## **Description of Additional Supplementary Files**

File Name: Supplementary Data 1

Description: Table of key resources used for this study
