# Supplementary material for: Dormant origin firing promotes head-on transcription-replication conflicts at transcription termination sites in response to BRCA2 deficiency
Source: PubMed Central journal article supplement (PMC11148086; doi:10.1038/s41467-024-48286-1), 2024-06-03
Supplement: 41467_2024_48286_MOESM4_ESM.pdf [file 41467_2024_48286_MOESM4_ESM.pdf]

## Supplementary Data 1- Key Resources Table

| REAGENT or RESOURCE                                                                  | SOURCE          | IDENTIFIER                            |
|--------------------------------------------------------------------------------------|-----------------|---------------------------------------|
| <b>Antibodies</b>                                                                    |                 |                                       |
| Rabbit polyclonal anti-BRCA2                                                         | Abcam           | Cat# ab123491,<br>RRID:AB_10972163    |
| Mouse monoclonal anti-BRCA2                                                          | Millipore Sigma | Cat#OP95<br>RRID:AB_2067762           |
| Rabbit polyclonal anti-phospho-RPA32 (ser33)                                         | Thermo          | Cat# A300-246A,<br>RRID:AB_2180847    |
| Rabbit polyclonal anti-RPA32                                                         | Thermo          | Cat# A300-244A,<br>RRID:AB_185548     |
| Mouse monoclonal anti-alpha-Tubulin                                                  | Sigma           | Cat# CP06,<br>RRID:AB_2617116         |
| Peroxidase-AffiniPure Goat anti-Rabbit IgG (H+L)                                     | Jackson Labs    | Cat# 111-035-003,<br>RRID:AB_2313567  |
| Peroxidase-AffiniPure Goat anti-Mouse IgG (H+L)                                      | Jackson Labs    | Cat# 115-035-003,<br>RRID:AB_10015289 |
| Rabbit recombinant monoclonal anti-RNA polymerase II CTD repeat YSPTSPS (phospho S2) | Abcam           | Cat# ab193468,<br>RRID:AB_2905557     |
| Mouse monoclonal anti-PCNA                                                           | Santa Cruz      | Cat# sc-56,<br>RRID:AB_628110         |
| Rabbit polyclonal anti-RNA polymerase II CTD repeat YSPTSPS (phospho S5)             | Abcam           | Cat# ab5131,<br>RRID:AB_449369        |
| Mouse monoclonal anti-RPB1 CTD (4H8)                                                 | Cell Signaling  | Cat# 2629,<br>RRID:AB_2167468         |
| Rabbit polyclonal anti-PCNA                                                          | Thermo          | Cat# A300-276A,<br>RRID:AB_263393     |
| Mouse recombinant RNA pol II CTD phospho Ser2                                        | Active Motif    | Cat# 91115,<br>RRID:AB_2793780        |
| Mouse recombinant RNA pol II CTD phospho Ser5                                        | Active Motif    | Cat# 61086,<br>RRID:AB_2687451        |
| Goat anti-Mouse IgG (H+L) AF488 Conjugated                                           | Thermo          | Cat# A-11029,<br>RRID:AB_2534088      |
| Mouse anti-BrdU [B44]                                                                | BD Biosciences  | Cat# 347580,<br>RRID:AB_10015219      |
| Rat monoclonal anti-BrdU [BU1/75 ICR1]]                                              | Abcam           | Cat# ab6326,<br>RRID:AB_305426        |
| Goat anti-Rat IgG (H+L) AF594 Conjugated                                             | Thermo          | Cat# A-11007,<br>RRID:AB_10561522     |
| Rabbit monoclonal anti-V5-Tag (D3H8Q)                                                | Cell Signaling  | Cat# 13202,<br>RRID:AB_2687461        |
| Rabbit polyclonal anti-RNase H1                                                      | Proteintech     | Cat# 15606-1-AP,<br>RRID:AB_2238624   |
| Rabbit polyclonal anti-RNase H2A                                                     | Thermo          | Cat# PA5-20667,<br>RRID:AB_11155195   |

|                                                               |                  |                                      |
|---------------------------------------------------------------|------------------|--------------------------------------|
| Rabbit polyclonal anti-BRCA2                                  | Novus            | Cat# NBP1-88361,<br>RRID:AB_11036414 |
| Goat anti-Rabbit IgG (H+L) AF647 Conjugated                   | Thermo           | Cat# A-21245,<br>RRID:AB_141775      |
| Rabbit polyclonal anti-RNase H2A                              | Proteintech      | Cat# 16132-1-AP,<br>RRID:AB_2269729  |
| Mouse monoclonal anti-phospho-histone H2A.X (Ser139) [JBW301] | Millipore        | Cat# 05-636,<br>RRID:AB_309864       |
| Mouse monoclonal anti-DNA-RNA Hybrid [S9.6]                   | Kerafast         | Cat# ENH001,<br>RRID:AB_2687463      |
| <b>Chemicals, peptides, and recombinant proteins</b>          |                  |                                      |
| Doxycycline                                                   | Fisher           | BP2653                               |
| Hydroxyurea                                                   | Sigma            | H8267                                |
| Biotin TEG-Azide                                              | Berry and Assoc. | BT 1085                              |
| CUSO4 – click chemistry grade                                 | Jena Biosciences | M1004-50                             |
| Ascorbic acid                                                 | Sigma            | A92902                               |
| Dynabeads MyOne Streptavidin T1                               | Thermo           | 65601                                |
| cOmplete Mini-Protease Inhibitor Cocktail                     | Roche            | 11836170001                          |
| 5'-ethynyl-2-deoxyuridine (EdU)                               | Sigma            | 900584                               |
| 5'-Iodo-2'-deoxyuridine (IdU)                                 | Sigma            | I7125                                |
| 5'-chloro-2'-deoxyuridine (CldU)                              | Sigma            | C6891                                |
| Opti-MEM                                                      | Gibco            | 31985-062                            |
| Lipofectamine RNAiMAX                                         | Thermo           | 13778150                             |
| DMEM/F12                                                      | Gibco            | 11320-033                            |
| DMEM                                                          | Gibco            | 11995-065                            |
| Penicillin-streptomycin                                       | Gibco            | 15140122                             |
| Ultrosor G                                                    | Sartorius        | 15950-017                            |
| Fetal Bovine Serum                                            | R&D Systems      | S11150H                              |
| Prolong gold anti-fade reagent                                | Invitrogen       | P36934                               |
| Paraformaldehyde 32% solution EM grade                        | EMS              | 15714-S                              |
| Ultrapure phenol:chloroform:isoamyl alcohol                   | Thermo           | 15593049                             |
| T4 DNA ligase                                                 | Enzymatics       | L6030-LC-L                           |
| T4 polynucleotide kinase                                      | NEB              | M0201L                               |
| Proteinase K                                                  | Roche            | 3115828001                           |
| Dimethyl sulfoxide (DMSO)                                     | Fisher           | BP231-100                            |
| Trypsin-EDTA 0.25%                                            | Gibco            | 25200056                             |
| Phusion HF buffer                                             | NEB              | B0518S                               |
| Phusion high-fidelity DNA polymerase                          | NEB              | M0530                                |
| SPRIselect beads                                              | Beckman Coulter  | B23317                               |
| Fugene HD                                                     | Promega          | E2311                                |
| 1-b-D-ribofuranoside                                          | Sigma            | SML0350                              |
| Formaldehyde 37%                                              | VWR              | M134                                 |
| Protein G Dynabeads                                           | Thermo           | 10003D                               |
| CDC7 inhibitor, PHA767491                                     | Santa Cruz       | sc-311303                            |
| ATR inhibitor IV, VE-821                                      | Fisher           | 5-04972-0001                         |

|                                                |                    |                                     |
|------------------------------------------------|--------------------|-------------------------------------|
| PARP inhibitor, AZD2281                        | Cayman             | 10621                               |
| <b>Critical commercial assays</b>              |                    |                                     |
| Duolink® In Situ PLA® Probe Anti-Rabbit PLUS   | Sigma              | DUO92002                            |
| Duolink® In Situ PLA® Probe Anti-Mouse MINUS   | Sigma              | DUO92004                            |
| Duolink® In Situ Detection Reagents Red        | Sigma              | DUO92008                            |
| Duolink® In Situ Detection Reagents Green      | Sigma              | DUO92014                            |
| Qubit dsDNA HS assay kit                       | Thermo             | Q32851                              |
| KAPA library quantification kit                | Roche              | KK4824                              |
| CellTiter-Glo Luminescent Cell Viability Assay | Promega            | G7570                               |
| Click-iT Plus EdU Imaging Kit                  | Thermo             | C10646                              |
| Universal Mycoplasma Detection Kit             | ATCC               | 301012K                             |
| <b>Deposited data</b>                          |                    |                                     |
| Raw and processed data – Ok-seq                | This study         | GEO:GSE239858                       |
| Raw and processed data – RNA-seq               | This study         | GEO:GSE239858                       |
| Raw and processed data – Ok-seq                | Chen et al. (2019) | GEO:GSE114017                       |
| <b>Experimental models: Cell lines</b>         |                    |                                     |
| hTERT FT194                                    | ATCC               | CRL3445                             |
| hTERT FT194 shScramble                         | This study         |                                     |
| hTERT FT194 shBRCA2                            | This study         |                                     |
| <b>Oligonucleotides</b>                        |                    |                                     |
| TRIPZ shBRCA2 target sequence                  | Horizon            | TGAGCTTTTCGCAACTTC<br>CA            |
| TRIPZ shScramble target sequence               | Horizon            | ATCTCGCTTGGGCGAGA<br>GTAAG          |
| siRNA – BRCA2#1                                | Qiagen             | 5'-<br>CAGCGTTTGTGTATCGG<br>GCAA-3' |
| siRNA – BRCA2#3                                | Qiagen             | 5'- TACGTA CTCCA-<br>GAACATTTAA-3'  |
| siRNA – RnaseH2A#4                             | Qiagen             | 5'-<br>CAGGTATTCGTGGACAC<br>CGTA-3' |
| COL5A2 TTS - F                                 | This study         | 5'-<br>GCATGCCTGAAAACCTG<br>TCA-3'  |
| COL5A2 TTS - R                                 | This study         | 5'-<br>ACTGCCGTTATCCTTGTC<br>CA-3'  |
| MAP2K2 TTS - F                                 | This study         | 5'-<br>ACTTTTTGGTGTGTCCG<br>GGG-3'  |
| MAP2K2 TTS - R                                 | This study         | 5'-<br>CATATGTGCTGGCTTCT<br>GCC-3'  |
| PLXNA1 TTS - F                                 | This study         | 5'-                                 |

|                       |            |                                      |
|-----------------------|------------|--------------------------------------|
|                       |            | GGTGTGACACATCCCCA<br>AGG-3'          |
| <i>PLXNA1</i> TTS - R | This study | 5'-<br>ACTTACAGGCAGTGCTC<br>AGAC-3'  |
| <i>SEPT9</i> TTS - F  | This study | 5'-<br>TGCCAACCTAACTCATT<br>CAAGA-3' |
| <i>SEPT9</i> TTS - R  | This study | 5'-<br>AGCTCACCTGCAAAGAA<br>AAGC-3'  |
| <i>TOM1L2</i> TTS – F | This study | 5'-<br>TGGGTACTGGTTCTGCC<br>ACT-3'   |
| <i>TOM1L2</i> TTS – R | This study | 5'-<br>CAGGGTGGACTCACCAA<br>ACC-3'   |
| <i>MYO1B</i> TTS – F  | This study | 5'<br>TCACAGCCCTAACTTGTT<br>CCC-3'   |
| <i>MYO1B</i> TTS – R  | This study | 5'-<br>GGGTCTGGGTACTCCTA<br>GTCA-3'  |
| <i>SEPT9</i> TSS – F  | This study | 5'-<br>GCGCAGGGAGAACAAAT<br>GAT-3'   |
| <i>SEPT9</i> TSS – R  | This study | 5'-<br>GTGCGTCGATTGAGTTG<br>GAG-3'   |
| <i>SEPT9</i> In8 – F  | This study | 5'-<br>TAGGGGCTTCCATTCT<br>CCA-3'    |
| <i>SEPT9</i> In8 – R  | This study | 5'-<br>GCTCAGTTCTCCCTTGG<br>TCC-3'   |
| <i>PLXNA1</i> TSS – F | This study | 5'-<br>AAGGGCTCACACTGGGA<br>GAT-3'   |
| <i>PLXNA1</i> TSS – R | This study | 5'-<br>GGCAGAAGAGGGCATGT<br>GAA-3'   |
| <i>PLXNA1</i> In2 – F | This study | 5'-<br>ATCTGTGCTTCCTGGTG<br>AGC-3'   |
| <i>PLXNA1</i> In2 – R | This study | 5'-<br>CCCACAGTGGCCAACTA<br>CAT-3'   |

|                                |                                                                     |                                       |
|--------------------------------|---------------------------------------------------------------------|---------------------------------------|
| <i>MYO1B</i> TSS – F           | This study                                                          | 5'-<br>TGTTCAAGGGCCATGTG<br>AGTT-3'   |
| <i>MYO1B</i> TSS – R           | This study                                                          | 5'-<br>GCAATAAACGCTGGGCC<br>GAA-3'    |
| <i>MYO1B</i> In3 – F           | This study                                                          | 5'-<br>AATAGATTGGTGGGGAG<br>TGGGA-3'  |
| <i>MYO1B</i> TSS – R           | This study                                                          | 5'-<br>CAGCTTATGTAGCTACC<br>CCCA-3'   |
| <i>SI</i> TTS – F              | This study                                                          | 5'-<br>TGGTGATCTTCATGACC<br>AGTTGA-3' |
| <i>SI</i> TTS – R              | This study                                                          | 5'-<br>ACGTATTGATCTGACCA<br>CACACA-3' |
| <i>KCNK2</i> TTS – F           | This study                                                          | 5'-<br>ATGCTGAGTTTGTGTCCC<br>TC-3'    |
| <i>KCNK2</i> TTS – R           | This study                                                          | 5'-<br>GTCTGCATGTATTTAGCA<br>AGGGT-3' |
| <i>SNRPN</i> In – F            | Sanz et al. (2019)                                                  | 5'-<br>GCCAAATGAGTGAGGAT<br>GGT-3'    |
| <i>SNRPN</i> In – R            | Sanz et al. (2019)                                                  | 5'-<br>TCCTCTCTGCCTGACTC<br>CAT-3'    |
| <b>Recombinant DNA</b>         |                                                                     |                                       |
| ppyCAG_RNaseH1_WT              | Chen et al. (2017)                                                  | Addgene #111906                       |
| <b>Software and algorithms</b> |                                                                     |                                       |
| GraphPad Prism v8              | <a href="https://www.graphpad.com">https://www.graphpad.com</a>     |                                       |
| ImageJ v1.52a                  | <a href="https://imagej.nih.gov/ij/">https://imagej.nih.gov/ij/</a> |                                       |
| MatLab (v2017b)                | <a href="https://www.mathworks.com/">https://www.mathworks.com/</a> |                                       |
| <b>Other</b>                   |                                                                     |                                       |
|                                |                                                                     |                                       |
|                                |                                                                     |                                       |
